# Supplementary material
Source: publisher figshare collection journal article supplement (https://acs.figshare.com/ndownloader/files/14653079)
Supplement: Supplementary file 1 [file 14653079]

**Table S2**

| <b>Protein Symbol</b> | <b>Antibody for protein complete name</b>                                               | <b>Company</b>            | <b>Reference</b> |
|-----------------------|-----------------------------------------------------------------------------------------|---------------------------|------------------|
| ACC                   | Anti- Acetyl CoA Carboxylase                                                            | Cell Signaling Technology | 3662             |
| pACC                  | Anti- Acetyl CoA Carboxylase phosphorylated at serine 79                                | Cell Signaling Technology | 3661             |
| ACTB                  | Anti- beta-Actin                                                                        | Cell Signaling Technology | 3700             |
| AMPK                  | Anti- Total AMP-Activated Protein Kinase                                                | Cell Signaling Technology | 2793             |
| pAMPK                 | Anti- AMP-Activated Protein Kinase phosphorylated at threonine 172                      | Cell Signaling Technology | 2535             |
| ATGL                  | Anti- Adipose Triglyceride Lipase                                                       | Cayman Chemical           | 10006409         |
| CPT1                  | Anti- Carnitine Palmitoyl Transeferase 1                                                | Santa Cruz Biotechnology  | sc-98834         |
| PPARGC1               | Anti- Peroxisome proliferator-activated receptor gamma, coactivator 1 alpha             | Santa Cruz Biotechnology  | sc-13067         |
| STAT3                 | Anti- Total Signal transducer and activator of transcription 3                          | Santa Cruz Biotechnology  | sc-482           |
| pSTAT3                | Anti- Signal Transducer and Activator of Transcription 3 phosphorylated at tyrosine 705 | Cell Signaling Technology | 9145             |

**Table S2:** List of antibodies used in Western Blot procedures.
